# Supplementary material for: Selection on a Variant Associated with Improved Viral Clearance Drives Local, Adaptive Pseudogenization of Interferon Lambda 4 (IFNL4)
Source: PLOS journal article supplement (doi:10.1371/journal.pgen.1004681), 2014-10-16
Supplement: S1 (10.1371/journal.pgen.1004681.s001) [file journal.pgen.1004681.s001]

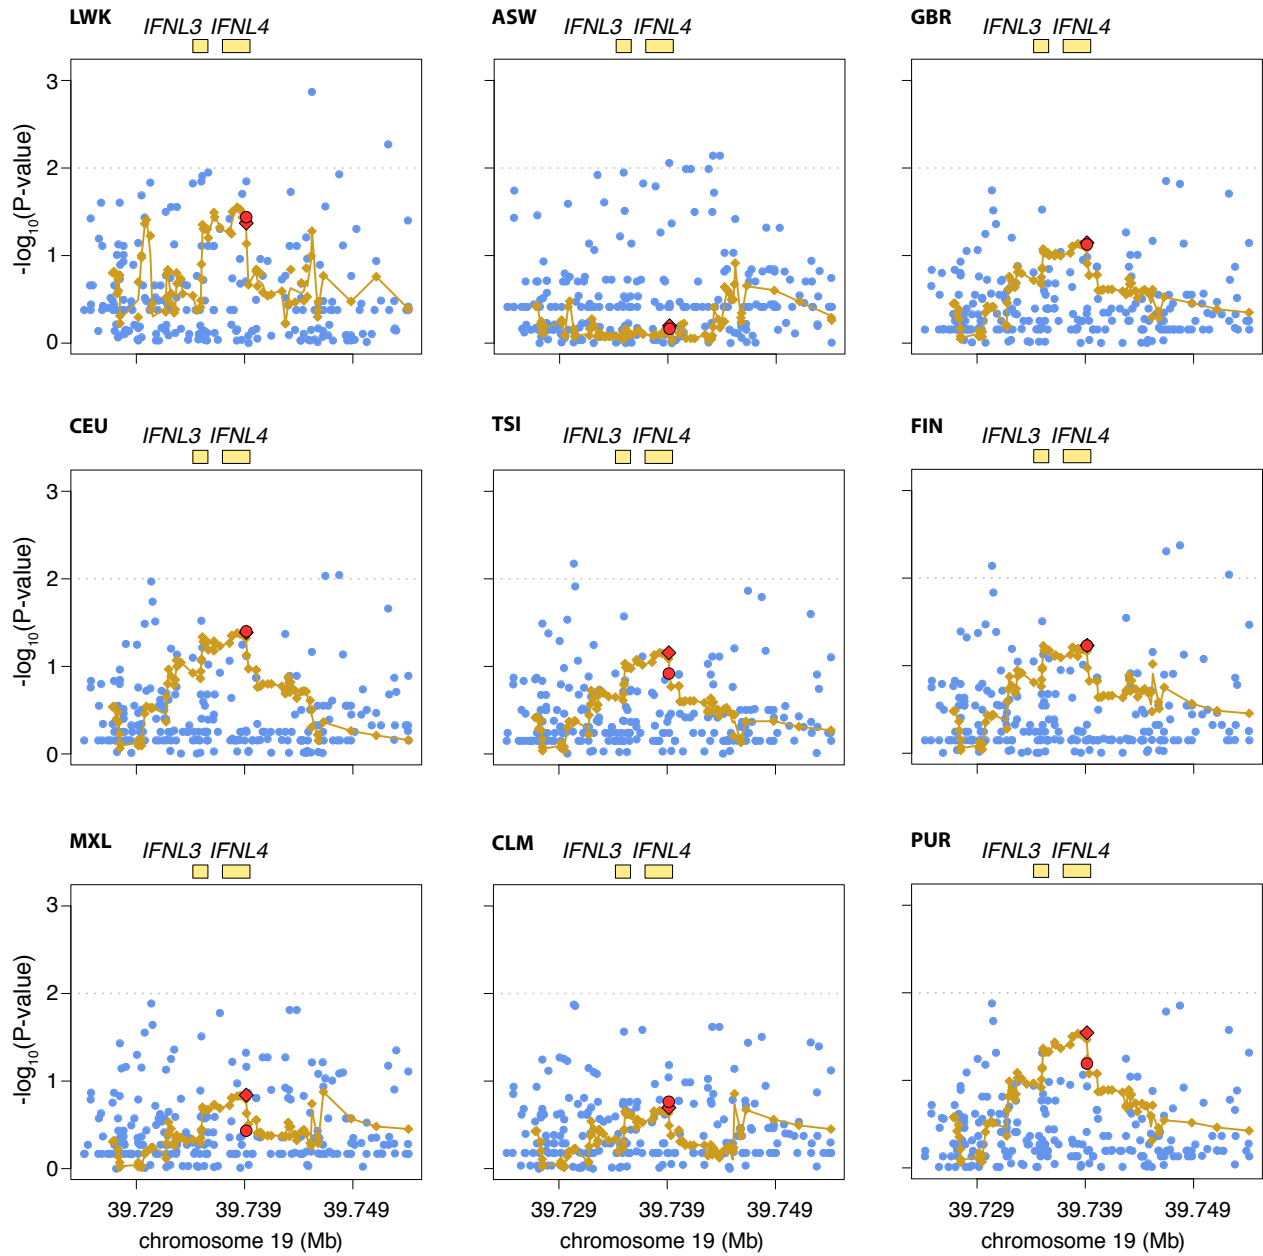

**Supplementary Figure 1. Empirical P-values of the  $F_{ST}$  and XP-EHH analyses for all non-Asian populations using YRI as background within a +15kb region around rs368234815.**

●/◆ denotes  $F_{ST}$  and XP-EHH for rs368234815 respectively; ●/◆ denotes  $F_{ST}$  and XP-EHH for all other variants in the region. All XP-EHH values are connected by a fitting curve (yellow line). The 1% tail of the genomic empirical distribution is indicated by the horizontal, dashed line.
